# Supplementary material
Source: Springer Nature journal article supplement (https://www.springermedizin.de/resource/supplementary/12913_2007_690_MOESM1_ESM.pdf/9535326)

# Hospital

Cure, physical function

# General practitioner

Psychosocial and physical aspects but not regarding specialized cancer treatment

Physiotherapist, psychologist other specialists

Needs for help  
after discharge

Sick note  
Homecare

Municipalities

Welfare benefits, sick leave

Working  
capabilities

Work

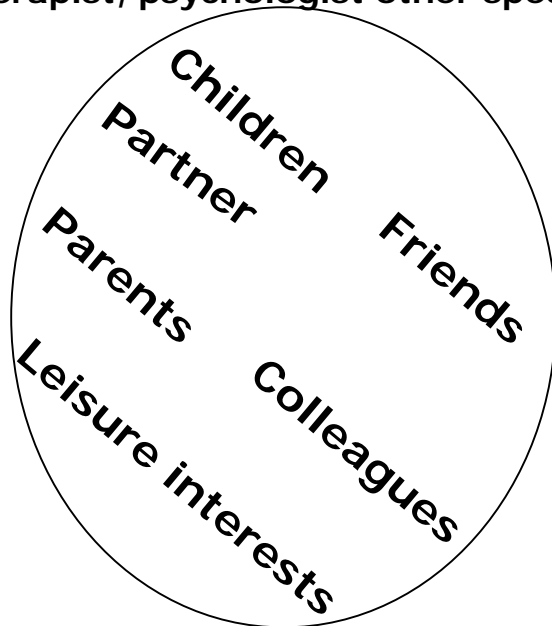

Supplement: MOESM1 [file 9535326]
